1 **Molecular diagnosis of causality in T cell mediated severe cutaneous adverse**  
2 **drug reactions**

3 Ying X Teo<sup>1,2</sup>, Wei Y Haw<sup>1</sup>, Andres F Vallejo<sup>1</sup>, Carolann McGuire<sup>1</sup>, Jeongmin

4 Woo<sup>1</sup>, Peter S Friedmann<sup>1</sup>, \*Marta E Polak<sup>1</sup>, \*Michael R Ardern-Jones<sup>1,2</sup>

5 \*joint senior authors

6 **Corresponding author(s):** 1. Michael Roger Ardern-Jones, Mailpoint 825, Clinical  
7 Experimental Sciences, Faculty of Medicine, University of Southampton,  
8 Southampton SO16 6YD, United Kingdom. Telephone: +44(0)23 81 205727. Email:  
9 [m.aj@soton.ac.uk](mailto:m.aj@soton.ac.uk)

10 2. Marta Ewa Polak, Mailpoint 813, Clinical Experimental Sciences, Faculty of  
11 Medicine, University of Southampton, Southampton SO16 6YD, United Kingdom.  
12 Telephone: +44(0)23 81 205727. Email: [m.e.polak@soton.ac.uk](mailto:m.e.polak@soton.ac.uk)

13 **Conflict of interest:** The authors have declared that no conflict of interest exists

14 **Keywords:**

15 Drug reaction with eosinophilia and systemic symptoms (DRESS); Drug allergy;  
16 Immunology; Biomarker; Diagnostics

---

<sup>1</sup> Clinical Experimental Sciences, Faculty of Medicine, University of Southampton, Southampton SO16 6YD, United Kingdom

<sup>2</sup> Department of Dermatology, Southampton General Hospital, University Hospitals Southampton NHS Foundation Trust  
NOTE: This preprint reports new research that has not been certified by peer review and should not be used to guide clinical practice.

17 **Abstract**

18 **Background:**

19 One of the most severe forms of T cell mediated cutaneous adverse drug reactions is  
20 'drug reaction with eosinophilia and systemic symptoms' (DRESS), hence subsequent  
21 avoidance of the causal drug is imperative. However, attribution of drug culpability in  
22 DRESS is challenging and standard skin allergy tests are not recommended due to  
23 for patient safety reasons. We sought to identify potential biomarkers for development  
24 of a diagnostic test.

25 **Methods:**

26 Peripheral blood mononuclear cells (PBMCs) from a 'discovery' cohort (n=5)  
27 challenged to drug or control were analysed for transcriptomic profile. A signature  
28 panel of genes was then tested in a validation cohort (n=6), and compared to tolerant  
29 controls and other inflammatory conditions which can clinically mimic DRESS. A  
30 scoring system to identify presence of drug hypersensitivity was developed based on  
31 gene expression alterations of this panel.

32 **Results:**

33 Whole transcriptome analysis identified 4 major gene clusters including those  
34 regulating T cell activation via NFAT and cytokine receptor activity. 22 differentially  
35 expressed gene transcripts were identified as a DRESS signature including Type 1  
36 interferon pathways and Th2 activation. The DRESS transcriptomic panel identified  
37 antibiotic-DRESS cases in a validation cohort but was not altered in other inflammatory  
38 conditions. Machine learning or differential expression selection of a biomarker panel  
39 showed high sensitivity and specificity (100% and 85.7-100% respectively) for  
40 identification of the culprit drug in DRESS.

41 Conclusion:

42 Transcriptomic analysis of DRESS revealed important insights into the key activated  
43 pathways and identified a transcriptional signature which shows potential as a test with  
44 high sensitivity for drug culpability attribution.

## 45 **Introduction**

46 Drug allergies (drug hypersensitivity) caused by T cell mediated reactions are clinically  
47 distinct in their presentation from IgE-mediated drug allergy reactions and present as  
48 a range of different clinical phenotypes (1), including Drug Reaction with Eosinophilia  
49 and Systemic Symptoms (DRESS). DRESS typically presents with a florid skin  
50 eruption combined with hallmark systemic features of fever, lymphadenopathy, blood  
51 dyscrasias such as eosinophilia, and internal organ involvement (1-3). The liver is the  
52 most commonly involved among the organs, found in 51–94.2% of patients; followed  
53 by renal involvement, lung, cardiac and central nervous system (4-7). Future lifelong  
54 avoidance of the culprit drug is crucial as DRESS can be life-threatening, reported  
55 mortality being 2-6% (2, 4, 8). Confirmation of causality can be difficult if the culprit  
56 drug is not clinically obvious.

57 Skin tests and oral challenge cannot be performed acutely and are generally not  
58 recommended because of the risk of re-inducing DRESS. Clinical algorithms to assess  
59 causality are of value, especially for post-marketing surveillance systems, but their  
60 lack of confirmatory testing limits their utility to inform treatment decisions for an  
61 individual patient (9). We and others have demonstrated the diagnostic use of  
62 classical immunology tests to measure drug specific T cell activation (10, 11).  
63 However, such *in vitro* assays are not widely available due to being labour intensive,  
64 complex, and involving radioisotopes. Therefore, there is an unmet need to develop  
65 a simple, quick and robust *in vitro* assay that can be undertaken widely in routine  
66 diagnostic laboratories.

67 We set out to develop an *in vitro* gene transcription signature to identify drug-induced  
68 T cell activation because reverse transcriptase polymerase chain reaction (RT-PCR)

69 based assays are already widely employed in clinical laboratories and therefore this  
70 approach would be scalable to routine laboratories. To determine the optimal  
71 biomarkers for drug T cell activation, we undertook ribonucleic acid-sequencing (RNA-  
72 seq) of drug-exposed peripheral blood mononuclear cells (PBMCs) from antibiotic-  
73 induced DRESS cases. Differential expression from control samples identified  
74 candidate genes as markers of drug hypersensitivity, which were further validated  
75 against a second cohort, against tolerant controls and in other inflammatory  
76 conditions.

## 77 **Results**

### 78 **Correlation between clinical diagnosis and *in vitro* assays**

79 DRESS was the most common presentation of DHR in Southampton tertiary referral  
80 centre (53% of diagnosed DHR in 2017-2018) and in our cohort, antibiotics were the  
81 dominant causal drugs for this condition (Figure 1a). 5 cases of antibiotic-induced  
82 DRESS were selected ('discovery' cohort). Cohort characteristics (median age 49  
83 years, IQR: 36-71), are described in Table 1. We confirmed that all identified antibiotic-  
84 DRESS cases demonstrated positive *in vitro* responses to stimulation with the culprit  
85 antibiotic, whereas no drug-induced responses were detected in tolerant controls (LPA  
86  $p = 0.0025$ , IFN- $\gamma$   $p = 0.0025$ , Mann-Whitney U test) (Figure 1 b,c).

### 87 **Antibiotic exposure induces transcriptomic programmes encoding immune 88 activation in PBMCs from DRESS patients**

89 To identify transcriptomic biomarkers specific for DRESS induced by antibiotics,  
90 discovery cohort PBMCs were co-cultured with culprit drug or control *in vitro* for 24  
91 hours before isolation of RNA for transcriptome profiling (Figure 2a). This identified  
92 267 drug-specific differentially expressed genes (DEGs) (149 up and 118 down-  
93 regulated; EdgeR, FDR  $p < 0.05$ ,  $\log_{2}FC \geq |1|$ , Figure 2b). Transcript-to-transcript  
94 clustering (GraphiaPro, Pearson  $r \geq 0.85$ , MCL = 1.7) identified 4 main clusters (Figure  
95 2c). Clusters 1 and 3, comprising 141 genes in total, were enriched in genes regulating  
96 cytokine receptor activity (Cluster 1, FDR  $p = 7.67 \times 10^{-7}$ ) and T cell activation via NFAT  
97 (Cluster 3, FDR  $p = 1 \times 10^{-3}$ , Figure 2d,e). In contrast, genes in clusters 2 and 4 were  
98 downregulated, and indicated modulation of innate immune system function (Cluster  
99 2, FDR  $p = 1.87 \times 10^{-2}$ ) and reduced integrin interactions (Cluster 4, FDR  $p = 1.65 \times 10^{-3}$ ,  
100 Figure 2d,e).

## 101 **Identification of candidate molecular biomarkers for DRESS**

102 To select a panel of candidate biomarkers, DEGs exceeding  $|\logFC| \geq 1.5$  were filtered  
103 for the nominal gene expression value (minimum cpm  $\geq 4$  for all the donors, at least  
104 100cpm). The resulting 48 candidate biomarkers were evaluated for predictive value  
105 using a random forest algorithm in R (package Ranger, alpha=0.9, trees = 500). The  
106 top 10 genes with absolute FC  $\geq |2|$  (up and down regulation) and RF importance  $\geq$   
107 0.05 (Figure 3a, b) and 12 additional immune-related genes were included in the final  
108 candidate biomarker panel (Figure 3a, full list of genes including 2 housekeeping  
109 genes in Supplemental Table S1). Unsupervised principal component clustering of the  
110 candidate biomarkers confirmed that they efficiently differentiated drug-exposed cells  
111 from their media control counterparts (Figure 3c). RNA-seq analysis was validated  
112 using RT-qPCR for the top 4 gene transcripts (Supplemental Figure 1) and a  
113 customised array card confirming the differential expression profile of all 22 transcripts  
114 ( $r = 0.9542$   $p = <0.0001$ ) Figure 3d). The differential expression of the candidate  
115 biomarker panel (Figure 3e) highlights that although the signature differentiates drug-  
116 exposed cells from the control, a degree of heterogeneity existed in expression of  
117 specific genes between different subjects.

## 118 **DRESS biomarkers are specific to drug hypersensitivity**

119 To determine if the identified biomarker panel was DRESS specific, we undertook a  
120 comparative analysis with influenza infection (GSE114588), sepsis (GSE60424),  
121 systemic lupus erythematosus (GSE112087) and dermatomyositis (GSE125977).  
122 Gene expression in these four conditions differed markedly from DRESS (Figure 4),  
123 and showed low correlations between DRESS and influenza (0.351), sepsis (-0.179),

124 systemic lupus erythematosus (0.327), and dermatomyositis (0.321) (Pearson  
125 correlation coefficient).

### 126 **Validation of DRESS gene signature panel**

127 To confirm the candidate molecular biomarker panel, we prospectively identified a  
128 'validation cohort' (6 cases of DRESS caused by antibiotics: cefoxitin, vancomycin and  
129 teicoplanin) as well as patients tolerant of the same antibiotics (n=7). This group was  
130 similar in terms of age, sex, and time to onset (Table 1). Similar to the discovery cohort,  
131 positive tests for drug hypersensitivity were demonstrated by T cell functional assays  
132 *in vitro* (LPA p = 0.0082, IFN- $\gamma$  p = 0.0012, Mann-Whitney U test) in all DRESS subjects  
133 (Figure 5a, b). To validate the gene signature panel, PBMCs from allergics were  
134 challenged with culprit medications, and the 22-candidate biomarker panel analysed.  
135 Comparison of culprit drug against media control in DRESS patients (Figure 5c) and  
136 between DRESS cohort against tolerant individuals (Figure 5d) showed clearly  
137 identifiable differences. In tolerant subjects, the 22 candidate biomarkers tested were  
138 only minimally affected following exposure to antibiotics (median change in gene  
139 expression relative to *YWHAZ* for each gene  $2^{-\Delta\Delta CT} = 1.04$ , range: 0.68-1.81),  
140 confirming the signature was specific for DRESS. As expected, some heterogeneity in  
141 the gene expression patterns between individuals was evident in both tolerant controls  
142 and allergic individuals.

### 143 **An algorithm for analysis of gene expression alterations as a diagnostic** 144 **approach in antibiotic-DRESS**

145 A point attribution system based on observed changes in each of the transcripts from  
146 the 22-gene biomarker panel was developed. Scoring 6 DRESS subjects and 7  
147 tolerant controls showed statistically significant difference (p = 0.0052, Mann-Whitney  
148 U test) when scored against all 22 genes (Figure 5e, full scores listed in Supplemental



149 Table S2). By setting a threshold score of 6, this novel scoring system was able to  
150 correctly stratify almost all cases (5 DRESS, 6 controls) with high sensitivity and  
151 specificity (83.3% and 85.7% respectively,  $p=0.029$ , Fisher's exact test).

152 **Machine learning identifies optimal panel of biomarkers differentiating**  
153 **antibiotic-DRESS patients from tolerant controls**

154 However, because it was apparent that not all genes contributed equally to the 22-  
155 gene scoring matrix that had been developed, we set out to evaluate which gene  
156 marker or combination of biomarkers had the highest predictive value for a prospective  
157 diagnostic test. Firstly, we took a machine learning approach and trained a random  
158 forest algorithm using the validation cohort data (Ranger package, R,  $\alpha = 0.9$ ,  
159  $\text{trees}=500$ , binary input). The analysis ranked the candidate biomarkers in order of  
160 importance for predictive classification (Figure 6a, Supplemental Table S3). For the  
161 10 highest ranked markers, receiver operating characteristics (ROC) analysis showed  
162 100% sensitivity and 100% specificity (AUC = 1). Secondly, we tested a reduced panel  
163 of biomarkers identified by their individually significant differential expression between  
164 allergics and tolerants: *STAC*, *GPR183*, *CD40*, *CISH*, *CD4*, and *CCL8* (Figure 6c) in  
165 contrast to the other genes in the 22-gene panel (Supplemental Figure 2). By applying  
166 our scoring algorithm manually to these 6 genes using a threshold score of 0, we  
167 enhanced the diagnostic accuracy as compared to the 22-panel (sensitivity 100%,  
168 specificity 85.7%;  $p = 0.0047$ , Fisher's exact test; Figure 6d; Supplemental Table S4).

169

170 **Discussion**

171 Criteria for diagnosis of DRESS are clear: cutaneous eruption with hematologic  
172 abnormalities and systemic involvement, with the addition of HHV-6 reactivation by  
173 Japanese criteria (3, 12). However, the optimal diagnostic work-up to identify a causal  
174 drug has remained elusive. Key to the management of DRESS is prompt  
175 discontinuation of the culprit drug, as the process can be progressive and even result  
176 in catastrophic organ failure (4, 13) and latterly autoimmune sequelae. The  
177 determination of drug culpability based only on chronological history of drug ingestion  
178 is often unreliable because of heterogeneous presentations and sometimes confusing  
179 long-latent periods following the introduction of drugs. In addition to this, definitive  
180 challenge testing is inadvisable in DRESS, leaving few alternative options for  
181 diagnostic assessment. Particularly challenging are patients taking multiple  
182 medications simultaneously. Whilst some groups, including ourselves, have utilised *in*  
183 *vitro* functional T cell assays in an attempt to elucidate the causal drugs (10, 11, 14),  
184 multiple issues restrict the widespread availability of such assays. These include the  
185 need for specialist resources and expertise, as well as variation in reported sensitivity  
186 of tests suggesting a user-dependent variability (14, 15). There is a clear need for new  
187 approaches to this issue.

188 By using a non-hypothesis driven approach to evaluate to identify DRESS activated  
189 molecular pathways we sought to maximise the possibility to detect a DRESS-specific  
190 signature. Furthermore, such an approach also contributes to better understanding of  
191 disease pathogenesis (16, 17). Transcriptomic profiling by RNA sequencing is  
192 advantageous as not only does it enable identification of key differentially expressed  
193 genes but also has high sensitivity for low abundance transcripts (18, 19). Utilisation

194 of RNAseq in melanoma (20, 21), psoriasis and atopic dermatitis (19) has enabled  
195 classification based on phenotype, prognosis, and prediction of intervention outcome.  
196 The availability of such technology should therefore be harnessed to further our  
197 understanding of cutaneous drug reactions to enable emergent clinical applications.

198 Here, using a multi-method, unbiased analysis approach, we were able to determine  
199 22 key genes which were differentially regulated in blood cells from allergic individuals  
200 after *in vitro* exposure to the culprit drug. Of the 22 transcripts identified, we used a  
201 machine learning approach to select 10 and a more traditional differential expression  
202 approach to select 6 with the strongest association with DRESS. *GPR183* (G-protein  
203 coupled receptor 183; syn. Epstein-Barr virus (EBV)-induced gene 2, *EBI2*) is  
204 expressed in lymphocytes where, by binding oxysterols, it creates a chemotactic  
205 gradient to direct movement of B-cells, T-cells, dendritic cells and  
206 monocytes/macrophages (22, 23). Down-regulation of GPR183 as induced by  
207 exposure to the culprit drug in allergics in this study, has been shown to enhance  
208 production of type 1 IFNs and inflammatory cytokines by blood dendritic cells (24).  
209 Therefore, this may reflect an important pathway for enhanced drug-antigen  
210 presentation to CD8+ T cells in DRESS, which may contribute to the organ damage  
211 seen in this condition (25). CD4 down-regulation is well established as a consequence  
212 of Th2 activation. The down-regulation of CD4 expression in allergics following drug  
213 exposure as seen here is interesting because evidence of drug-specific HLA-  
214 restriction in DRESS has so far only identified MHC Class I alleles (26). These results  
215 therefore support the possibility that drug-specific CD4+ T cells may play an important  
216 role in DRESS. Further evidence of the role of CD4 activation is suggested by the  
217 enhanced CCL8 expression in allergics. CCL8 has been shown to be central to  
218 recruiting IL-5 producing Th2 cells (27), which in turn regulate eosinophilia, thus linking

219 these transcript changes to the hallmarks of DRESS. In addition, *CISH* (cytokine  
220 inducible SH2 containing protein), was found to be upregulated by culprit drug  
221 exposure in allergics and has been shown to be a marker of allergen-specific Th2 cells  
222 (28). Taken together, these data suggest an important role for drug-specific Th2 cells  
223 in DRESS and raise the possibility of therapeutic targeting of the Th2 pathway in acute  
224 disease. Recent drugs are already licensed for such purposes to treat other Th2  
225 diseases including those targeting IL-4Ra, and anti-IL5. *STAC* (SH3 and cysteine-rich  
226 containing protein), a mediator of calcium-dependent inactivation, was also up-  
227 regulated in DRESS and whilst it is likely to be important in regulating inflammation  
228 (29), the precise role of *STAC1* (as here), remains to be established.

229 However, for diagnostic approaches, the sensitivity and specificity of the identified  
230 signature is key. Using a machine learning approach, we were able to select 10 genes  
231 which were demonstrated a sensitivity and specificity of 100%. However, to  
232 demonstrate conservative assessment of the utility of these biomarkers in DRESS, we  
233 showed that a combined panel of six genes, identified by differential gene expression  
234 statistics within the validation cohort allowed robust identification of the causative  
235 antibiotic in DRESS with greater accuracy than that of the initial 22 gene algorithm  
236 (sensitivity 100%, specificity 85.7%). Furthermore, we showed that these gene  
237 expression profiles were not evident in healthy volunteers who tolerated the drugs in  
238 question, and also that they were not induced in other inflammatory conditions, which  
239 can mimic or precede onset of DRESS. Accordingly, the systems biology approach  
240 confirmed that the proposed diagnostic panel is a distinct gene expression signature  
241 for DRESS.

242

243 Kim et al. recently applied single-cell RNA sequencing (scRNA-seq) to a single case  
244 of DRESS, and identified transcriptomal alterations in associated with proliferation,  
245 migration, activation and signalling pathways, which then informed therapeutic options  
246 (30). Whilst such an approach may be ideal, scRNA-seq applicability to clinical  
247 practice is limited by high cost and need for expertise. For diagnostic purposes, we  
248 validated that the transcriptomic signature identified here could be reliably interrogated  
249 by TaqMan array cards, which would be amenable to utilisation in non-specialist  
250 routine pathology laboratories. However, this approach would also be suited to a hub  
251 and spoke model for diagnostic testing because the good stability of frozen lysate prior  
252 to RNA extraction would enable batched transport and processing if necessary. Whilst  
253 downstream processing does require a degree of expertise, centralisation of this would  
254 reduce technical variability. It also remains possible that by subjecting greater  
255 numbers of cases to molecular profiling, patterns in the gene signature signal could  
256 identify hereto-unrecognised DRESS endotypes characterised by a correlation  
257 between clinical features and molecular signature (5, 6, 8, 31-34). A wholly *ex vivo*  
258 diagnostic test is safe and requires only a minimal amount of blood sampling from  
259 patients. Moreover, as the incidence of DRESS is relatively low, between 1:1000 to  
260 1:10,000 drug exposures (35), our preferred approach is to utilise a paired analysis  
261 (control vs drug) in diagnostic samples, which mitigates the need for validation of  
262 normal ranges for population-wide background correction.

263 The limitations of this work include the sample size, and the restriction of the allergic  
264 cohorts tested to antibiotic induced DRESS. Whilst it remains uncertain whether this  
265 transcriptomic signature can be applied to other phenotypes e.g. Stevens-Johnson  
266 syndrome, we accepted a high stringency in the clinical phenotype inclusion criteria  
267 here because it would minimise sampling error and reduce the size of the cohort

268 required to identify a valid test. Additionally, our tested patients with DRESS were  
269 otherwise well at the time of sampling, and therefore, we have no data on the utility of  
270 this test in acutely ill patients. However, we did show that the diagnostic panel is not  
271 identified in cohorts with other severe infections or other inflammatory skin rashes,  
272 suggesting that the gene set measured here is specific to DRESS.

273 In summary, we show that a carefully selected panel of gene transcripts, which can be  
274 measured on a pre-printed array card, offers a useful diagnostic test in antibiotic-  
275 associated DRESS with a conservative assessment of 85.7% prediction rate (0.48-  
276 0.99 95% CI), and sensitivity of 100% and specificity of 85.7%, but that this could be  
277 higher with further refinement and validation. The advantage of this approach is that  
278 such gene card testing is familiar to hospital laboratories and therefore this technology  
279 is scalable for routine use. Further work is required to determine whether the same  
280 panel can be used for other drug hypersensitivity reactions, but the results here  
281 demonstrate a proof of concept for the development of gene signature panels for  
282 diagnosis of T cell mediated disease.

283

## 284 **Methods**

### 285 **Patients and controls**

286 Patients diagnosed with delayed hypersensitivity reaction (DHR) on clinical grounds  
287 by consultant dermatologists experienced in the recognition of these reactions were  
288 recruited to the study through the Department of Dermatology, University Hospital  
289 Southampton NHS Foundation Trust. Eleven DRESS patients with symptoms  
290 corresponding to diagnostic criteria for DRESS were identified as confirmed by  
291 RegiSCAR score  $\geq 3$  (4). Only subjects with no active infections or malignancies and  
292 without history of immunosuppression, including due to medications, were included. 7  
293 comparative tolerant controls (treated with a relevant antibiotic, but without DHR  
294 symptoms) were also tested. Patients were divided into a 'discovery' cohort (5 patients  
295 with DRESS caused by antibiotics: cefoxitin, dapsone, teicoplanin, or vancomycin) and  
296 a 'validation' cohort (6 patients with DRESS) (Table 1). All testing was undertaken on  
297 fresh (not frozen) samples isolated from anticoagulated peripheral blood. The tests  
298 were undertaken on average (mean) 370.7 days from rash onset (median: 124 days,  
299 IQR 71-347).

### 300 **Lymphocyte Proliferation and ELISpot test**

301 Lymphocyte proliferation test and IFN- $\gamma$  enzyme-linked immunosorbent spot assay  
302 (ELISpot) are routinely performed in our laboratory as we previously described (10,  
303 11). Briefly, peripheral blood mononuclear cells (PBMCs) were cultured in the  
304 presence of the relevant drug at four concentrations overnight at 37°C, 5% CO<sub>2</sub> on  
305 pre-coated ELISpot plates (Millipore, UK; Mabtech, Sweden) and for 5 days  
306 (lymphocyte proliferation assay, LPA) respectively, in triplicate. Internal validation of  
307 the assays was achieved with negative (medium) and positive (phytohemagglutinin,

308 PHA) controls. For ELISpot testing, after overnight culture, plates were washed and  
309 developed as per manufacturer's instructions. Spot-forming units per million cells  
310 were enumerated using an automated ELISpot reader (Autoimmun Diagnostika  
311 GmbH, Strassberg, Germany). Positive responses were recorded as those responses  
312 greater than the mean of all the background samples plus 2x the standard deviation  
313 (SD) of the background. For LPA testing, on day 5, 1  $\mu$ Ci/ml of 3H-thymidine  
314 (Amersham, UK) was added, and the cells harvested 6 hours later for scintillation  
315 counting. The stimulation index (SI) was calculated as the fold difference between  
316 counts per minute recorded in wells stimulated by drug over the negative control. SI  
317 greater than 2 was considered a positive result (Table 1).

#### 318 **RNA isolation and purification**

319 PBMCs ( $7.5 \times 10^5$  cells per well, in duplicates) were incubated for 24 hours with medium  
320 (control) or culprit drug before RNA harvesting for transcriptomic analysis. Following  
321 24-hour stimulation with drug or control medium, PBMCs were harvested, washed,  
322 and suspended in RLT lysing buffer (Qiagen, UK) before storage at  $-20^\circ\text{C}$ . Each  
323 sample was thawed immediately before RNA isolation and whole transcriptome RNA-  
324 sequencing. RNA extraction and purification were performed according to  
325 manufacturer's protocol (RNeasy Plus Mini Kit, Qiagen, UK). DNA contamination in  
326 the collected RNA was eliminated by use of gDNA Eliminator spin column. RNA  
327 quantity and quality checking were performed using the NanoDrop™ 1000  
328 spectrophotometer (Thermo Fisher Scientific, Waltham, MA, USA) and Agilent 2100  
329 Bioanalyzer using an RNA 6000 Nano LabChip kit (Agilent Technologies, Cork,  
330 Ireland). All samples displayed a 260/280 ratio  $>1.8$  and RNA integrity numbers (RIN)  
331  $> 7.7$ . Purified RNA samples were stored at  $-80^\circ\text{C}$  until use.



### 332 **mRNA-Seq library construction and sequencing**

333 Total RNA samples were subjected to indexed cDNA library construction, using the  
334 Illumina TruSeq poly(A) + RNA-Seq library construction, according to the  
335 manufacturer's instructions. For sequencing, all samples were pooled in a single pool  
336 and sequenced on 3 lanes, yielding 75-bp paired-end reads, using an Illumina HiSeq  
337 4000 platform (an outsourced service at the Oxford Genomics Centre).

### 338 **Bioinformatics analysis**

339 Quality-controlled reads were aligned to the reference genome GRCh37.EBVB95-  
340 8wt.ERCC using the HISAT aligner. Alignments were counted for each gene using the  
341 featureCounts package (36). Aligned reads were further analysed in R using the  
342 Bioconductor suite of packages. Filtered trimmed mean of M values (TMM) normalised  
343 counts per million (cpm) (EdgeR, filtering out genes less than two gene counts in at  
344 least half of the samples) were used for downstream analyses (37). Determination of  
345 differentially expressed genes (DEG) was performed using EdgeR with a nested  
346 paired design (37). The expected false discovery rate (FDR) was estimated using the  
347 Benjamini-and-Hochberg method. An FDR adjusted  $p \leq 0.05$  was considered  
348 significant.

349 RNA-seq data were deposited in accordance with MIAME guidelines, in Gene  
350 Expression Omnibus (GEO) under accession number GSE160369.

### 351 **Quantitative Reverse Transcription-PCR (qRT-PCR)**

352 The expression of chosen genes was validated with quantitative PCR using the  
353 TaqMan gene expression assays for target genes: *YWHAZ* (Hs01122445\_g1), *STAC*  
354 (Hs00182385\_m1), *CISH* (Hs00367082\_g1), *FN1* (Hs01549976\_m1) and *CD4*  
355 (Hs01058407\_m1) (Applied Biosystems, Life Technologies, UK) in PBMCs isolated

356 from whole blood. RNA extraction (RNeasy Plus Mini Kit, Qiagen) and cDNA reverse  
357 transcription, including RT-negative control, (High-Capacity cDNA Reverse  
358 Transcription Kit, Applied Biosystems; ThermoFisher Scientific UK) were carried out  
359 according to the manufacturer's protocol. qPCR was performed in 384-well plate  
360 assay, using Applied Biosystems 7900HT Fast Real-Time PCR System. Gene  
361 expression levels were normalised to housekeeping gene expression (*YWHAZ*).

### 362 **TaqMan array card**

363 Customised RT-PCR cards from Applied Biosystems  
364 (<http://www.appliedbiosystems.com>) were used in the quantitative analysis of the 22  
365 selected candidate genes. Eight samples with two technical duplicates were tested  
366 per card. The 384-well microfluidic card was preloaded with our chosen genes. Each  
367 cDNA sample was added to an equal volume of mastermix (TaqMan, Applied  
368 Biosystems) and then loaded onto the array card. PCR amplification was performed  
369 using a 7900HT Fast Real-time PCR System (Applied Biosystems) following the  
370 protocol described by the manufacturer. The threshold cycle (CT) was automatically  
371 given by the SDS2.2® software package (Applied Biosystems). Relative expression  
372 of each gene was normalized to *YWHAZ* as the sole housekeeping gene, and log<sub>2</sub>-  
373 transformed for analysis ( $RQ=2^{-\Delta\Delta Ct}$ ). All data were generated in duplicate for each  
374 gene expression per sample.

### 375 **Evaluation of diagnostic performances**

376 Ranking of detected genes for selection of candidate biomarker genes was done using  
377 absolute log fold change (FC) cut off ( $\log FC \geq |1.5|$ ) calculated using generalised linear  
378 model in EdgeR, combined with minimum expression levels for all donors (minimum  
379  $cpm \geq 4$ , maximum  $cpm \geq 100$ ). Random forest analysis was performed using package

380 Ranger in R (importance measure = impurity, number of trees = 500, alpha = 0.9).  
381 Combinatorial panel analysis with top 10 candidate genes identified on random forest  
382 algorithm were performed using CombiRoc webtool (38). Receiver-operating  
383 characteristic (ROC) curves were calculated in order to assess the diagnostic power  
384 of the gene combination by the area under the curve (AUC) of the ROC curve.  
385 Potential biomarkers were considered valuable if sensitivity and specificity were >85%,  
386 as well as AUC  $\geq$ 0.8.

### 387 **Comparison with systemic inflammatory conditions**

388 Datasets for 4 systemic conditions: influenza, sepsis, systemic lupus erythematosus  
389 and dermatomyositis were downloaded from publically available genomic data  
390 repositories (GSE114588, GSE60424, GSE112087, GSE125977). FASTQ files for  
391 GSE114588 and GSE60424 were aligned using Kallisto (39) against the GRCh38  
392 human reference genome followed by differential analysis using Sleuth (40). Disease  
393 describing gene expression signatures were generated by comparing TMM  
394 normalised gene expression levels between experimental and control group using  
395 EdgeR package (37) (FC  $\geq$ log<sub>2</sub> and adjusted p value <0.05). Raw RNA-seq data for  
396 GSE112087 was quantified to gene-level counts using the ARCHS4 pipeline (41) with  
397 similar thresholds as the other datasets. Published values (FC  $\geq$ log<sub>2</sub>) relating to  
398 dermatomyositis subjects from GSE125977 were extracted for comparative analysis.  
399 Enrichment analyses performed to published gene sets associated with these four  
400 inflammatory conditions (influenza 2, sepsis 5, systemic lupus erythematosus 5,  
401 dermatomyositis 1) did not show significant overlap (enrichment scores: 0.27-0.55,  
402 FDR<0.05).

### 403 **Functional enrichment analysis**

404 Gene set enrichment analysis (GSEA) (42, 43) was performed for complete DRESS  
405 dataset (11747 transcripts, average were calculated for transcripts associated with the  
406 same genes (3 genes)) using curated gene signatures of 4 inflammatory diseases  
407 above downloaded from MSigDB (Molecular Signatures Database v7.1)  
408 (**Supplemental Table S5**). Largest collections relating to dermatomyositis from  
409 DisGeNET platform (v7.0) (44, 45) were used in view of no available curated gene  
410 sets for this disease on other MSigDB platform (42, 46). Similarities were examined at  
411 cut-off of FDR-adjusted p-value <0.05 and Enrichment Scores.

#### 412 **Scoring classification**

413 Mean values for each biomarker gene was calculated from RT-qPCR data from 6  
414 DRESS subjects tested using the array card and compared against logFC RNAseq  
415 data to determine up- and down-regulated genes in the signature panel. For every  
416 transcript expression which matched this expected change, 1 point was added whilst  
417 1 point was subtracted if direction of change was opposite to that of the identified  
418 signature. Log<sub>2</sub> 2<sup>- $\Delta\Delta C_t$</sup>  values for each subject (6 DRESS, 7 tolerant controls) were  
419 used in this scoring. No points were added or subtracted if values fell between -0.25  
420 and 0.25.

#### 421 **Statistics**

422 Statistical analyses were performed using Prism 8.1 (GraphPad Software) and  
423 methods embedded in bioinformatics pipelines (Generalised Linear Model, EdgeR,  
424 Benjamini-and-Hochberg FDR-corrected p-value test). Mann-Whitney U test was used  
425 for comparison between non-matched non-parametric samples and Fisher's exact test  
426 for contingency table analysis. Correlations between RNA-seq and qPCR results were

427 performed using Pearson test and linear regression analysis. Data were considered  
428 significant at  $p < 0.05$ .

429 **Study approval:** Ethical approval for this project was obtained from the UK Research  
430 Ethics Service (RES) of the national Health Research Authority (17/NE/0346) for  
431 subject recruitment at University Hospital Southampton NHS Trust. Written informed  
432 consent from all participants was obtained prior to inclusion in the study.

433 **Author contributions:** YXT and WYH performed experiments, analysed data and  
434 drafted the manuscript. AFV analysed data and provided technical support. CG  
435 performed experiments. JW analysed data. PSF contributed to study design and  
436 oversaw writing of the manuscript. MEP and MAJ designed the research study,  
437 analysed data and oversaw writing of the manuscript.

438 **Acknowledgements:** This work was supported by the British Skin Foundation [grant  
439 number BSF8021]. MEP is funded by the Wellcome Trust [grant number  
440 109377/Z/15/Z]. The authors acknowledge the use of the IRIDIS High Performance  
441 Computing Facility, and associated support services at the University of  
442 Southampton, in the completion of this work as well as assistance from Christopher  
443 Woelk PhD, and Tilman Sanchez-Elsner PhD. We thank the Oxford Genomics  
444 Centre at the Wellcome Centre for Human Genetics (funded by Wellcome Trust  
445 grant reference 203141/Z/16/Z) for the generation and initial processing of the  
446 sequencing data.

447

448 **Figures**

449 **Figure 1**

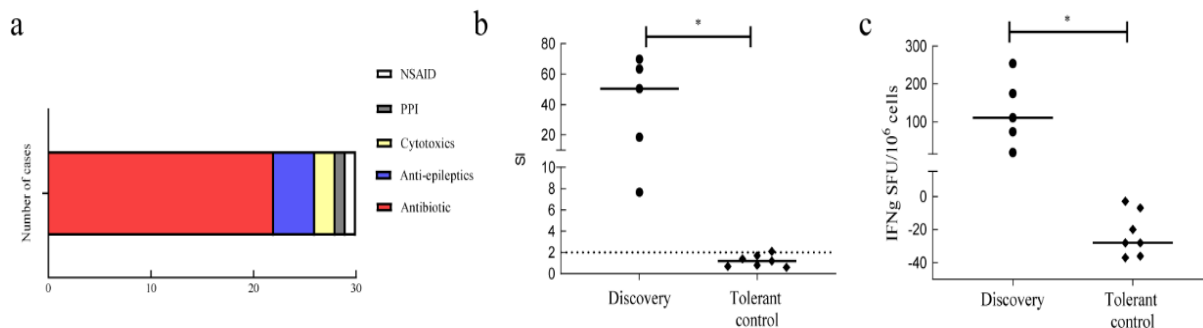

450

451 **Figure 1:** Causative drugs in referred DRESS cases and confirmation of clinically suspected antibiotic  
452 by positive T cell assay in DRESS 'discovery' cohort. a) Prevalence of causative drug groups in  
453 DRESS cases referred to Southampton NHS Foundation Trust between 2017-2018. b) Lymphocyte  
454 Proliferation Test (LPA) measured as stimulation index (SI) of proliferation induced by drug versus  
455 media control and c) IFN- $\gamma$  release in drug-induced responses measured by ELISpot in 'discovery'  
456 cohort subjects (n=5), and control patients tolerant of similar antibiotics (n=7). Each data point  
457 represents maximum measured response to tested drug. Horizontal solid lines indicate group median.  
458 Horizontal dotted line shows positive result threshold. Mann-Whitney U test used for assessing  
459 statistical significance, \* = p-value < 0.05. DRESS = drug reaction with eosinophilia and systemic  
460 symptoms, IFN- $\gamma$  ELISpot = interferon-gamma enzyme-linked immunosorbent spot, LPA = lymphocyte  
461 proliferation assay, NSAID = non-steroidal anti-inflammatory, PPI = protein pump inhibitor, SFU = spot  
462 forming unit

463

464 **Figure 2**

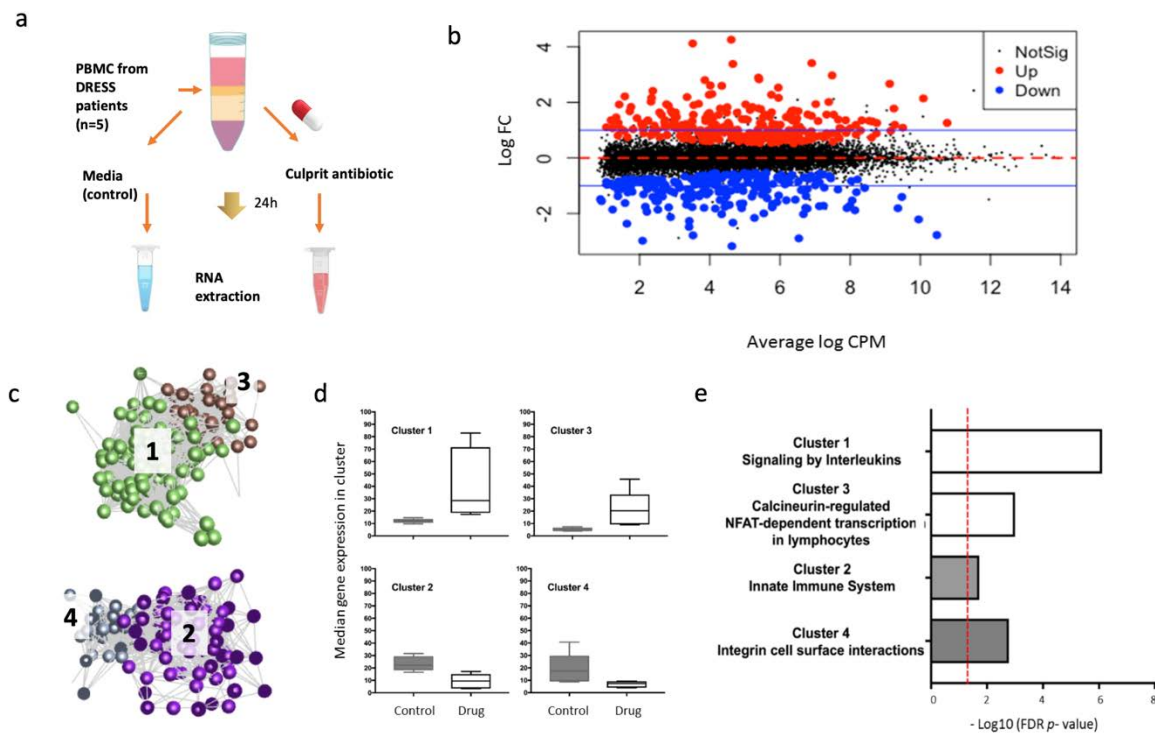

465

466 **Figure 2:** Testing protocol and identification of Differentially Expressed Genes. a) PBMCs were cultured  
 467 in culture media supplemented or not with culprit drug at the optimised concentration for 24 hours before  
 468 RNA extraction. b) MA plot representation of 267 drug-specific DEGs (149 up-regulated, red; 118 down-  
 469 regulated, blue; FDR  $p < 0.05$ , blue line depicts a threshold of  $\log FC \geq |1|$ ). c-e) Transcript-to-transcript  
 470 correlation network analysis of gene expression changes induced by culprit drug in DRESS patients  
 471 (discovery cohort,  $n=5$ ). 4 major clusters shown, cluster 1 (green,  $n=103$  genes), cluster 2 (purple,  $n=$   
 472 76 genes), cluster 3 (brown,  $n=39$  genes), cluster 4 (grey,  $n=32$  genes). Each node (dot) indicates a  
 473 transcript, each line defines the Pearson correlation coefficient between a pair of nodes (GraphiaPro,  
 474 Pearson  $r \geq 0.85$ , MCL = 1.7). d) Median gene expression profiles in clusters 1-4 in control (grey) and  
 475 drug exposed cells (white). Box and whiskers indicate median  $\pm$  range. e) Key processes identified  
 476 by gene ontology analysis specific to each cluster (ToppGene, FDR cut-off 0.05, cluster 1: FDR  $p = 7.67 \times 10^{-7}$ ,  
 477 cluster 2: FDR  $p = 1.87 \times 10^{-2}$ ; cluster 3: FDR  $p = 1 \times 10^{-3}$ ; cluster 4: FDR  $p = 1.65 \times 10^{-3}$ ).  
 478 DEG=differentially expressed gene, FC=fold change, FDR=false discovery rate

479

480 **Figure 3**

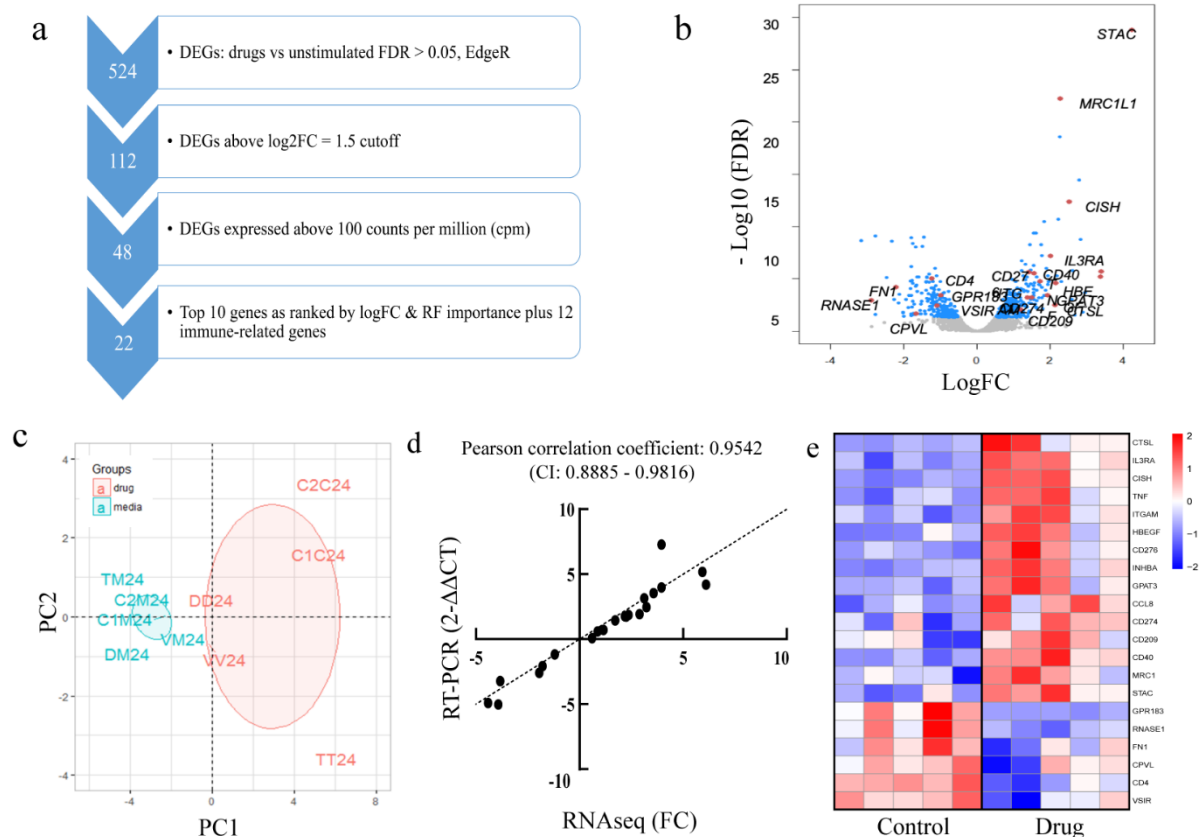

481

482

483 **Figure 3:** Identification of candidate biomarker genes. a) Selection of candidate biomarkers. Following  
 484 identification of 524 DEGs by comparison of drug-stimulated and media (unstimulated) in the discovery  
 485 cohort (EdgeR package,  $FDR < 0.05$ ), genes with  $|\log_2FC| \geq 1.5$  and  $cpm > 100$  were selected. 10 genes  
 486 with absolute  $FC \geq 2$  and random forest (RF) importance  $\geq 0.05$  were selected from the filtered genes  
 487 and combined with 12 immune-related genes to form the gene panel. b) Volcano plot of genes  
 488 measured in DRESS discovery cohort, differentiating responses to culprit drug versus media control.  
 489 Differentially expressed genes ( $FDR < 0.05$ ) shown in blue (up-regulated genes on right, down-regulated  
 490 on left), genes selected indicated in red. c) PCA clustering (first two components) comparing signature  
 491 panel gene expression induced by culprit drug (red) and media (blue) after 24-hour culture. d)  
 492 Comparison of gene changes detected in panel genes using RNAseq and PCR with customised  
 493 microfluidic array card in a single subject, normalised to YWHAZ gene expression. e) Heatmap  
 494 depicting changes in expression of selected 22 candidate biomarkers in 5 antibiotic-DRESS patients  
 495 exposed to culprit drug versus media control. Colour indicates the expression change in  $\log_2FC$ . Red:  
 496 upregulated genes; blue: downregulated genes. DEG=differentially expressed gene, FC=fold change,  
 497 PC = principal component, PCA = principal component analysis, RF = random forest

498



499 **Figure 4**

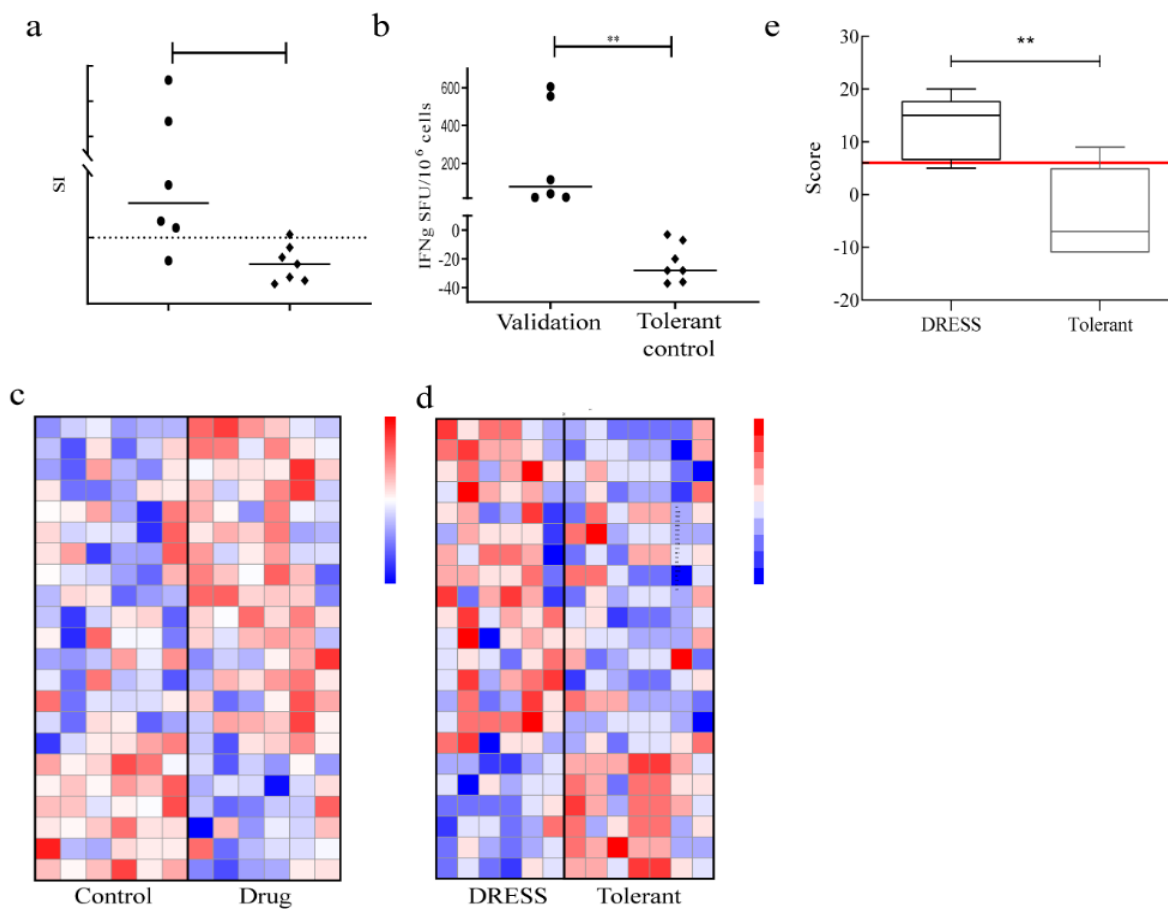

500

501 **Figure 4.** DRESS biomarkers are specific to drug hypersensitivity. Heatmap depicting expression of  
502 biomarker gene panel in samples sourced from public data repositories including influenza infection  
503 (GSE114588), sepsis (GSE60424), systemic lupus erythematosus (GSE112087) and dermatomyositis  
504 (GSE125977). Colour indicates the expression change compared to DRESS allergics. Red:  
505 upregulated genes, Blue: downregulated genes.

506

507 **Figure 5**

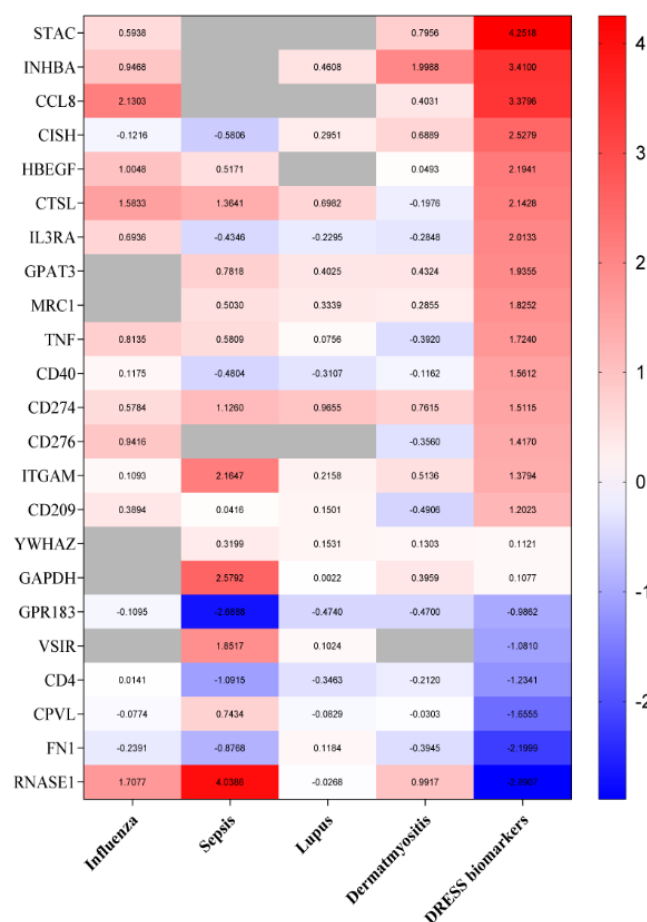

508

509 **Figure 5.** DRESS validation cohort confirms specificity of biomarker panel. a-b) Characteristics of *in*  
510 *vitro* responses to culprit drug in antibiotic-DRESS validation cohort (n=6) and control patients tolerant  
511 of similar antibiotics (n=7). a) Lymphocyte Proliferation Test (LPA) measured as stimulation index (SI)  
512 of proliferation induced by drug versus media control and b) IFN- $\gamma$  release in drug-induced responses  
513 measured by ELISpot. Each data point represents maximum measured response to tested drug. Each  
514 data point represents maximum measured response to tested drug. Horizontal solid lines indicate  
515 group median. Horizontal dotted line shows positive result threshold. Mann-Whitney U test used for  
516 statistical significance (\*\* =  $p < 0.01$ ). c) Heatmap depicting changes in expression of selected 22  
517 candidate biomarkers in validation DRESS cohort exposed to culprit drug versus media control.  
518 Colour indicates the expression change in logFC. Red: upregulated genes; blue: downregulated  
519 genes. d) Heatmap depicting changes in expression of selected 22 candidate biomarkers in validation  
520 DRESS cohort versus tolerant patients. Colour indicates the expression change in logFC. Red:  
521 upregulated genes, Blue: downregulated genes. e) Box and whisker plot showing cumulative scoring  
522 using 22 biomarker genes compared to expected expression alterations based on signature panel.  
523 Error bars indicate data range. Horizontal red line indicates threshold score considered positive. (\*\* =  
524  $p < 0.01$ , Fisher's exact test). IFN- $\gamma$  ELISpot = interferon-gamma enzyme-linked immunosorbent spot,  
525 SFU = spot forming unit

526

527 **Figure 6**

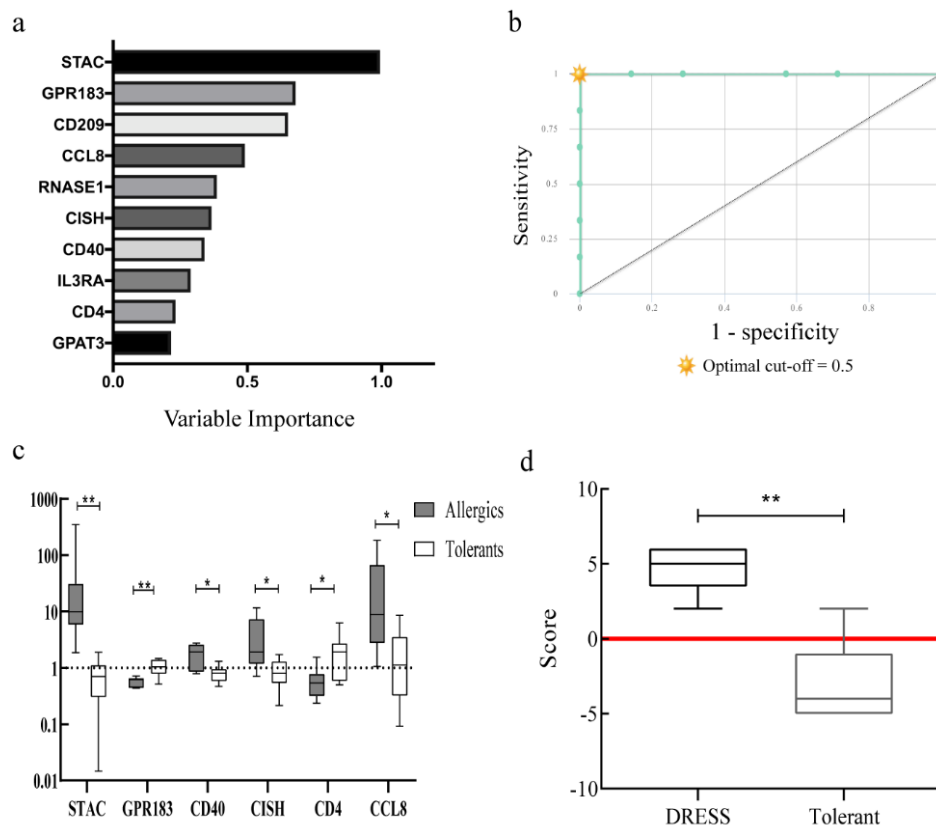

528

529 **Figure 6.** Optimisation of biomarker panel to differentiate DRESS due to antibiotics from tolerant  
530 controls. a) Gene importance for the biomarker panel measured by random forest, 10 genes with the  
531 highest importance shown (Ranger package, R, alpha = 0.9, trees=500, binary input).b) CombiROC  
532 analysis of 10 genes with highest importance (AUC = 1, sensitivity = 100%, specificity = 100%). c)  
533 Expression of genes in biomarker panel measured by qPCR in drug allergic patients (grey) and controls  
534 tolerant to specified antibiotics (white). Change induced in expression shown for 6 genes reaching  
535 statistical difference (\* =  $p < 0.05$ , \*\* =  $p < 0.01$ ) in expression change between patient cohorts ( $2^{-\Delta\Delta CT}$   
536 versus *YWHAZ* housekeeping gene). Box and whiskers indicate median and data range d) Box and  
537 whisker plot of novel scoring system using 6 select biomarker genes to stratify DRESS and control  
538 subjects. Error bars indicate data range. Horizontal red line indicates threshold score considered  
539 positive. (\*\* =  $p < 0.01$ , Fisher's exact test) ROC = receiver operator characteristic, AUC = area under  
540 curve, CI = confidence interval.

541 **Tables**

542 **Table 1:** Demographics of tested subjects and comparative T-cell assay results

| Cohort                      | Sex | Age range (years) | Phenotype | Drug        | RegiSCAR score | LPA (Cmax SI) | IFN- $\gamma$ [Cmax – (background + 2x SD)] |
|-----------------------------|-----|-------------------|-----------|-------------|----------------|---------------|---------------------------------------------|
| Discovery<br>n=5            | M   | 35-40             | DRESS     | Cefoxitin   | 3              | 69.9*         | 254                                         |
|                             | M   | 25-30             | DRESS     | Cefoxitin   | 5              | 63.4*         | 74                                          |
|                             | F   | 75-80             | DRESS     | Vancomycin  | 3              | 7.67*         | 10                                          |
|                             | M   | 45-50             | DRESS     | Teicoplanin | 6              | 50.4*         | 175                                         |
|                             | F   | 70-75             | DRESS     | Dapsone     | 5              | 18.5*         | 111                                         |
| Validation<br>n=6           | M   | 20-25             | DRESS     | Cefoxitin   | 3              | 13.7*         | 20                                          |
|                             | F   | 15-20             | DRESS     | Cefoxitin   | 3              | 3.6*          | 21                                          |
|                             | M   | 35-40             | DRESS     | Cefoxitin   | 3              | 2.3*          | 39                                          |
|                             | M   | 70-75             | DRESS     | Vancomycin  | 5              | 2.5*          | 554                                         |
|                             | F   | 40-45             | DRESS     | Vancomycin  | 4              | 18.4*         | 113                                         |
|                             | F   | 80-85             | DRESS     | Teicoplanin | 3              | 1.3           | 605                                         |
| Tolerant<br>controls<br>n=7 | F   | 25-30             | Tolerant  | Cefoxitin   | NA             | 1.7           | Neg                                         |
|                             | M   | 20-25             | Tolerant  | Cefoxitin   | NA             | 0.7           | Neg                                         |
|                             | F   | 80-85             | Tolerant  | Vancomycin  | NA             | 2.1           | Neg                                         |
|                             | F   | 80-85             | Tolerant  | Vancomycin  | NA             | 0.6           | Neg                                         |
|                             | M   | 55-60             | Tolerant  | Vancomycin  | NA             | 1.4           | Neg                                         |
|                             | F   | 65-70             | Tolerant  | Vancomycin  | NA             | 1.2           | Neg                                         |
|                             | M   | 60-65             | Tolerant  | Teicoplanin | NA             | 0.8           | Neg                                         |

543 Cmax = maximal concentration, IFN = interferon, LPA = lymphocyte proliferation assay, NA = not  
 544 applicable; Neg = negative, RegiSCAR = registry of Severe Cutaneous Adverse Reaction (RegiSCAR  
 545 score: 2-3 possible case, 4-5 probable case, >5 definite case), SD = standard deviation, \* = positive  
 546 result (SI >2)

547 **References:**

- 548 1. Brockow K, Ardern-Jones MR, Mockenhaupt M, Aberer W, Barbaud A, Caubet JC, et al. EAACI  
549 position paper on how to classify cutaneous manifestations of drug hypersensitivity. *Allergy*.  
550 2019;74(1):14-27.
- 551 2. Ardern-Jones MR, Mockenhaupt M. Making a diagnosis in severe cutaneous drug  
552 hypersensitivity reactions. *Curr Opin Allergy Clin Immunol*. 2019;19(4):283-93.
- 553 3. Shiohara T, Iijima M, Ikezawa Z, Hashimoto K. The diagnosis of a DRESS syndrome has been  
554 sufficiently established on the basis of typical clinical features and viral reactivations. *Br J Dermatol*.  
555 2007;156(5):1083-4.
- 556 4. Kardaun SH, Sekula P, Valeyrie-Allanore L, Liss Y, Chu CY, Creamer D, et al. Drug reaction  
557 with eosinophilia and systemic symptoms (DRESS): an original multisystem adverse drug reaction.  
558 Results from the prospective RegiSCAR study. *Br J Dermatol*. 2013;169(5):1071-80.
- 559 5. Chen Y-C, Chiu H-C, Chu C-Y. Drug Reaction With Eosinophilia and Systemic Symptoms: A  
560 Retrospective Study of 60 Cases. *Arch Dermatol*. 2010;146(12):1373-9.
- 561 6. Hiransuthikul A, Rattananupong T, Klaewsongkram J, Rerknimitr P, Pongprutthipan M,  
562 Ruxrungtham K. Drug-induced hypersensitivity syndrome/drug reaction with eosinophilia and  
563 systemic symptoms (DIHS/DRESS): 11 years retrospective study in Thailand. *Allergology international*  
564 : official journal of the Japanese Society of Allergology. 2016;65(4):432-8.
- 565 7. Martínez-Cabriales SA, Rodríguez-Bolaños F, Shear NH. Drug Reaction with Eosinophilia and  
566 Systemic Symptoms (DRESS): How Far Have We Come? *Am J Clin Dermatol*. 2019;20(2):217-36.
- 567 8. Wu X, Yang F, Chen S, Xiong H, Zhu Q, Gao X, et al. Clinical, Viral and Genetic Characteristics  
568 of Drug Reaction with Eosinophilia and Systemic Symptoms (DRESS) in Shanghai, China. *Acta Derm*  
569 *Venereol*. 2018;98(4):401-5.
- 570 9. Sassolas B, Haddad C, Mockenhaupt M, Dunant A, Liss Y, Bork K, et al. ALDEN, an algorithm  
571 for assessment of drug causality in Stevens-Johnson Syndrome and toxic epidermal necrolysis:  
572 comparison with case-control analysis. *Clin Pharmacol Ther*. 2010;88(1):60-8.
- 573 10. Haw WY, Polak ME, McGuire C, Erlewyn-Lajeunesse M, Ardern-Jones MR. In vitro rapid  
574 diagnostic tests for severe drug hypersensitivity reactions in children. *Ann Allergy Asthma Immunol*.  
575 2016;117(1):61-6.
- 576 11. Polak ME, Belgi G, McGuire C, Pickard C, Healy E, Friedmann PS, et al. In vitro diagnostic  
577 assays are effective during the acute phase of delayed-type drug hypersensitivity reactions. *Br J*  
578 *Dermatol*. 2013;168(3):539-49.
- 579 12. Shiohara T, Mizukawa Y. Drug-induced hypersensitivity syndrome (DIHS)/drug reaction with  
580 eosinophilia and systemic symptoms (DRESS): An update in 2019. *Allergology international* : official  
581 journal of the Japanese Society of Allergology. 2019;68(3):301-8.
- 582 13. Bocquet H, Bagot M, Roujeau JC. Drug-induced pseudolymphoma and drug hypersensitivity  
583 syndrome (Drug Rash with Eosinophilia and Systemic Symptoms: DRESS). *Semin Cutan Med Surg*.  
584 1996;15(4):250-7.
- 585 14. Mayorga C, Celik G, Rouzaire P, Whitaker P, Bonadonna P, Rodrigues-Cernadas J, et al. In  
586 vitro tests for drug hypersensitivity reactions: an ENDA/EAACI Drug Allergy Interest Group position  
587 paper. *Allergy*. 2016;71(8):1103-34.
- 588 15. Mayorga C, Ebo DG, Lang DM, Pichler WJ, Sabato V, Park MA, et al. Controversies in drug  
589 allergy: In vitro testing. *J Allergy Clin Immunol*. 2019;143(1):56-65.
- 590 16. Reuter Jason A, Spacek DV, Snyder Michael P. High-Throughput Sequencing Technologies.  
591 *Molecular Cell*. 2015;58(4):586-97.
- 592 17. Finotello F, Rieder D, Hackl H, Trajanoski Z. Next-generation computational tools for  
593 interrogating cancer immunity. *Nature reviews Genetics*. 2019;20(12):724-46.
- 594 18. Jabbari A, Suárez-Fariñas M, Dewell S, Krueger JG. Transcriptional profiling of psoriasis using  
595 RNA-seq reveals previously unidentified differentially expressed genes. *J Invest Dermatol*.  
596 2012;132(1):246-9.

- 597 19. Schwingen J, Kaplan M, Kurschus FC. Review-Current Concepts in Inflammatory Skin Diseases  
598 Evolved by Transcriptome Analysis: In-Depth Analysis of Atopic Dermatitis and Psoriasis. *Int J Mol*  
599 *Sci.* 2020;21(3).
- 600 20. Berger MF, Levin JZ, Vijayendran K, Sivachenko A, Adiconis X, Maguire J, et al. Integrative  
601 analysis of the melanoma transcriptome. *Genome research.* 2010;20(4):413-27.
- 602 21. Valsesia A, Rimoldi D, Martinet D, Ibberson M, Benaglio P, Quadroni M, et al. Network-  
603 guided analysis of genes with altered somatic copy number and gene expression reveals pathways  
604 commonly perturbed in metastatic melanoma. *PLoS ONE.* 2011;6(4):e18369.
- 605 22. Hannedouche S, Zhang J, Yi T, Shen W, Nguyen D, Pereira JP, et al. Oxysterols direct immune  
606 cell migration via EBI2. *Nature.* 2011;475(7357):524-7.
- 607 23. Benned-Jensen T, Norn C, Laurent S, Madsen CM, Larsen HM, Arfelt KN, et al. Molecular  
608 characterization of oxysterol binding to the Epstein-Barr virus-induced gene 2 (GPR183). *The Journal*  
609 *of biological chemistry.* 2012;287(42):35470-83.
- 610 24. Chiang EY, Johnston RJ, Grogan JL. EBI2 is a negative regulator of type I interferons in  
611 plasmacytoid and myeloid dendritic cells. *PLoS ONE.* 2013;8(12):e83457.
- 612 25. Picard D, Janela B, Descamps V, D'Incan M, Courville P, Jacquot S, et al. Drug reaction with  
613 eosinophilia and systemic symptoms (DRESS): a multiorgan antiviral T cell response. *Sci Transl Med.*  
614 2010;2(46):46ra62.
- 615 26. Mullan KA, Anderson A, Illing PT, Kwan P, Purcell AW, Mifsud NA. HLA-associated  
616 antiepileptic drug-induced cutaneous adverse reactions. *Hla.* 2019;93(6):417-35.
- 617 27. Islam SA, Chang DS, Colvin RA, Byrne MH, McCully ML, Moser B, et al. Mouse CCL8, a CCR8  
618 agonist, promotes atopic dermatitis by recruiting IL-5+ T(H)2 cells. *Nature immunology.*  
619 2011;12(2):167-77.
- 620 28. Nakajima Y, Tsuge I, Kondo Y, Komatsubara R, Hirata N, Kakami M, et al. Up-regulated  
621 cytokine-inducible SH2-containing protein expression in allergen-stimulated T cells from hen's egg-  
622 allergic patients. *Clin Exp Allergy.* 2008;38(9):1499-506.
- 623 29. Flucher BE, Campiglio M. STAC proteins: The missing link in skeletal muscle EC coupling and  
624 new regulators of calcium channel function. *Biochimica et biophysica acta Molecular cell research.*  
625 2019;1866(7):1101-10.
- 626 30. Kim D, Kobayashi T, Voisin B, Jo JH, Sakamoto K, Jin SP, et al. Targeted therapy guided by  
627 single-cell transcriptomic analysis in drug-induced hypersensitivity syndrome: a case report. *Nature*  
628 *medicine.* 2020;26(2):236-43.
- 629 31. Kano Y, Tohyama M, Aihara M, Matsukura S, Watanabe H, Sueki H, et al. Sequelae in 145  
630 patients with drug-induced hypersensitivity syndrome/drug reaction with eosinophilia and systemic  
631 symptoms: survey conducted by the Asian Research Committee on Severe Cutaneous Adverse  
632 Reactions (ASCAR). *J Dermatol.* 2015;42(3):276-82.
- 633 32. Wang L, Mei X-L. Drug Reaction with Eosinophilia and Systemic Symptoms: Retrospective  
634 Analysis of 104 Cases over One Decade. *Chin Med J.* 2017;130(8):943-9.
- 635 33. Eshki M, Allanore L, Musette P, Milpied B, Grange A, Guillaume JC, et al. Twelve-year analysis  
636 of severe cases of drug reaction with eosinophilia and systemic symptoms: a cause of unpredictable  
637 multiorgan failure. *Arch Dermatol.* 2009;145(1):67-72.
- 638 34. Agier MS, Boivin N, Maruani A, Giraudeau B, Gouraud A, Haramburu F, et al. Risk assessment  
639 of drug-induced drug reaction with eosinophilia and systemic symptoms (DRESS) syndrome: a  
640 disproportionality analysis using the French Pharmacovigilance Database. *Br J Dermatol.*  
641 2016;175(5):1067-9.
- 642 35. Fiszenson-Albala F, Auzevie V, Mahe E, Farinotti R, Durand-Stocco C, Crickx B, et al. A 6-  
643 month prospective survey of cutaneous drug reactions in a hospital setting. *Br J Dermatol.*  
644 2003;149(5):1018-22.
- 645 36. Liao Y, Smyth GK, Shi W. featureCounts: an efficient general purpose program for assigning  
646 sequence reads to genomic features. *Bioinformatics.* 2014;30(7):923-30.

- 647 37. Robinson MD, McCarthy DJ, Smyth GK. edgeR: a Bioconductor package for differential  
648 expression analysis of digital gene expression data. *Bioinformatics*. 2010;26(1):139-40.
- 649 38. Mazzara S, Rossi RL, Grifantini R, Donizetti S, Abrignani S, Bombaci M. CombiROC: an  
650 interactive web tool for selecting accurate marker combinations of omics data. *Sci Rep*.  
651 2017;7:45477.
- 652 39. Bray NL, Pimentel H, Melsted P, Pachter L. Near-optimal probabilistic RNA-seq  
653 quantification. *Nature biotechnology*. 2016;34(5):525-7.
- 654 40. Pimentel H, Bray NL, Puente S, Melsted P, Pachter L. Differential analysis of RNA-seq  
655 incorporating quantification uncertainty. *Nat Methods*. 2017;14(7):687-90.
- 656 41. Lachmann A, Torre D, Keenan AB, Jagodnik KM, Lee HJ, Wang L, et al. Massive mining of  
657 publicly available RNA-seq data from human and mouse. *Nature communications*. 2018;9(1):1366.
- 658 42. Subramanian A, Tamayo P, Mootha VK, Mukherjee S, Ebert BL, Gillette MA, et al. Gene set  
659 enrichment analysis: a knowledge-based approach for interpreting genome-wide expression profiles.  
660 *Proceedings of the National Academy of Sciences of the United States of America*.  
661 2005;102(43):15545-50.
- 662 43. Mootha VK, Lindgren CM, Eriksson KF, Subramanian A, Sihag S, Lehar J, et al. PGC-1alpha-  
663 responsive genes involved in oxidative phosphorylation are coordinately downregulated in human  
664 diabetes. *Nature genetics*. 2003;34(3):267-73.
- 665 44. Piñero J, Queralt-Rosinach N, Bravo À, Deu-Pons J, Bauer-Mehren A, Baron M, et al.  
666 DisGeNET: a discovery platform for the dynamical exploration of human diseases and their genes.  
667 *Database : the journal of biological databases and curation*. 2015;2015:bav028.
- 668 45. Piñero J, Ramírez-Anguita JM, Saüch-Pitarch J, Ronzano F, Centeno E, Sanz F, et al. The  
669 DisGeNET knowledge platform for disease genomics: 2019 update. *Nucleic acids research*.  
670 2020;48(D1):D845-d55.
- 671 46. Liberzon A, Birger C, Thorvaldsdóttir H, Ghandi M, Mesirov JP, Tamayo P. The Molecular  
672 Signatures Database (MSigDB) hallmark gene set collection. *Cell systems*. 2015;1(6):417-25.
